# Supplementary material for: Clinical Characteristics and Risk Factors for Fatality and Severity in Patients with Coronavirus Disease in Korea: A Nationwide Population-Based Retrospective Study Using the Korean Health Insurance Review and Assessment Service (HIRA) Database
Source: PubMed Central journal article supplement (PMC7698934; doi:10.3390/ijerph17228559), 2020-11-18
Supplement: ijerph-17-08559-s001.pdf [file ijerph-17-08559-s001.pdf]

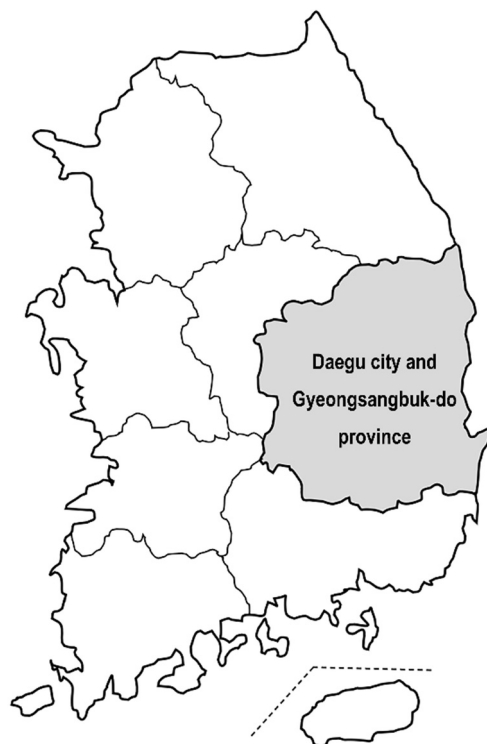

**Figure 1.** Location of Daegu city and Gyeongsangbuk-do province.

**Table S1.** Association between each class of antibiotics and death in patients with coronavirus disease-19 infection.

|                 | Univariable Model   |                | Multivariable Model 1 * |                | Multivariable Model 2 § |                 |
|-----------------|---------------------|----------------|-------------------------|----------------|-------------------------|-----------------|
|                 | OR (95% CI)         | <i>p</i> Value | OR (95% CI)             | <i>p</i> Value | OR (95% CI)             | <i>p</i> -Value |
| Penicillins     | 25.43 (19.05–33.93) | <0.001         | 4.36 (2.94–6.49)        | <0.001         | 8.40 (6.04–11.68)       | <0.001          |
| Cephalosporins  | 8.27 (6.21–11.01)   | <0.001         | 1.14 (0.72–1.79)        | 0.576          | 2.27 (1.65–3.14)        | <0.001          |
| Quinolones      | 8.19 (6.13–10.94)   | <0.001         | 1.41 (0.94–2.10)        | 0.098          | 2.85 (2.06–3.93)        | <0.001          |
| Macrolides      | 4.80 (3.67–6.29)    | <0.001         | 1.14 (0.75–1.73)        | 0.538          | 1.43 (1.05–6.69)        | 0.025           |
| Aminoglycosides | 6.99 (3.22–15.18)   | <0.001         | 0.84 (0.27–2.61)        | 0.764          | 4.35 (1.63–11.59)       | 0.003           |
| TMP/SMX         | 7.39 (3.39–16.11)   | <0.001         | 0.69 (0.21–2.29)        | 0.541          | 2.65 (1.05–6.69)        | 0.039           |
| Tetracyclines   | 5.70 (2.18–14.90)   | <0.001         | 0.45 (0.11–1.90)        | 0.276          | 3.07 (0.91–10.33)       | 0.070           |
| Others          | 30.14 (22.06–41.17) | <0.001         | 3.96 (2.48–6.32)        | <0.001         | 8.76 (6.04–12.71)       | <0.001          |

\* Included all variables regarding medications and comorbidities and variables with  $p < 0.05$  in the univariable logistic regression analyses. § Included one medication at a time with all variables regarding comorbidities and significant variables in the univariable analyses and one comorbidity at a time with all variables regarding medications and significant variables in the univariable analyses. TMP/SMX: Trimethoprim and sulfamethoxazole.

**Table S2.** Association between each class of antibiotics and severe disease in patients with coronavirus disease-19 infection.

|                 | Univariable Model   |                | Multivariable Model 1 * |                | Multivariable Model 2 § |                 |
|-----------------|---------------------|----------------|-------------------------|----------------|-------------------------|-----------------|
|                 | OR (95% CI)         | <i>p</i> Value | OR (95% CI)             | <i>p</i> Value | OR (95% CI)             | <i>p</i> -Value |
| Penicillins     | 19.69 (16.41–23.64) | <0.001         | 4.44 (3.49–5.64)        | <0.001         | 10.07 (8.18–12.40)      | <0.001          |
| Cephalosporins  | 10.01 (8.61–11.64)  | <0.001         | 2.02 (1.62–2.54)        | <0.001         | 4.90 (4.14–5.81)        | <0.001          |
| Quinolones      | 8.64 (7.44–10.04)   | <0.001         | 2.05 (1.67–2.52)        | <0.001         | 4.64 (3.93–5.48)        | <0.001          |
| Macrolides      | 5.95 (5.12–6.92)    | <0.001         | 1.39 (1.09–1.77)        | 0.009          | 3.00 (2.51–3.58)        | <0.001          |
| Aminoglycosides | 11.72 (6.39–21.49)  | <0.001         | 1.95 (0.86–4.43)        | 0.109          | 12.48 (6.04–25.78)      | <0.001          |
| TMP/SMX         | 27.09 (12.95–56.66) | <0.001         | 2.16 (0.86–5.39)        | 0.100          | 14.46 (6.38–32.75)      | <0.001          |
| Tetracyclines   | 6.61 (3.33–13.12)   | <0.001         | 2.41 (0.65–9.00)        | 0.191          | 6.51 (2.67–15.84)       | <0.001          |
| Others          | 39.46 (28.11–55.38) | <0.001         | 4.39 (2.65–6.74)        | <0.001         | 16.62 (11.38–24.28)     | <0.001          |

\* Included all variables regarding medications and comorbidities and variables with  $p < 0.05$  in the univariable logistic regression analyses. § Included one medication at a time with all variables regarding comorbidities and significant variables in the univariable analyses and one comorbidity at a time with all variables regarding medications and significant variables in the univariable analyses. TMP/SMX: Trimethoprim and sulfamethoxazole.
